# TABLE OF CONTENTS

# ANESTHESIOLOGY

Volume 136

Issue 6

June 2022

This Month in ANESTHESIOLOGY .....A1

Science, Medicine, and the Anesthesiologist.....A13

Infographics in Anesthesiology .....A17

## Editorial

What Anesthesiology Has to Learn from Implementation Science and Quality Improvement

*M. B. Lane-Fall* .....875

Inflammatory Responses to Surgery and Postoperative Atrial Fibrillation

*S. Karamnov, J. D. Muehlschlegel* .....877

$\gamma$ -Aminobutyric Acid Type A Receptor Subtypes and Circuit Connections in Midazolam-induced Amnesia, Sedation, and Hypnosis

*S. A. Forman* .....880

Optimizing Postoperative Analgesia in the Multiverse of Peripheral Nerve Catheters

*E. M. Soffin* .....883

Anesthetic MAC: Origin, Utility, and Nomenclature Revisited

*E. D. Kharasch* .....885

## Special Article

Gadgeteering for Pain Relief: The 2021 John W. Severinghaus Lecture on Translational Science

*J. C. Eisenach* .....888

Severinghaus and the author developed as physician–scientists from initially addressing concrete goals to realizing failures, establishing networks, and finally asking questions more about *why* rather than *how*. This memorial lecture highlights this progression and their contributions to science.

## Perioperative Medicine

### CLINICAL SCIENCE

◆ ◆ Quantitative Neuromuscular Monitoring in Clinical Practice: A Professional Practice Change Initiative

◆ ◆ *W. A. Weigel, B. L. Williams, N. A. Hanson, C. C. Blackmore, R. L. Johnson, G. M. Nissen, A. B. James, W. M. Strodtbeck* .....901

A departmental professional practice initiative began with the goal of documenting a train-of-four ratio greater than or equal to 0.90 for all patients given a nondepolarizing neuromuscular blocking drug. This retrospective assessment of the implementation of documenting train-of-four ratios greater than or equal to 0.9 before extubation improved from 1% (2 of 172) of cases in November 2016 to 93% (250 of 269) of cases in December 2020. Attaining this endpoint required not only placing a quantitative monitor in each anesthetizing location but also ongoing educational efforts and follow-up. *SUPPLEMENTAL DIGITAL CONTENT IS AVAILABLE IN THE TEXT*

◆ ◆ Amiodarone with or without *N*-Acetylcysteine for the Prevention of Atrial Fibrillation after Thoracic Surgery: A Double-blind, Randomized Trial

◆ ◆ *D. Amar, H. Zhang, M. K. Chung, K. S. Tan, D. Desiderio, B. J. Park, A. Pedoto, N. Roistacher, J. M. Isbell, D. Molena, G. L. Milne, B. F. Meyers, G. W. Fischer, V. W. Rusch, D. R. Jones* .....916

This double-blinded randomized trial of noncardiac thoracic surgery patients was done to test the hypothesis that the addition of *N*-acetylcysteine to concurrent amiodarone administration would reduce the incidence of postoperative atrial fibrillation when compared with placebo being concurrently administered with amiodarone. The study was halted midway for futility, as there was no difference in postoperative atrial fibrillation in the patients who received *N*-acetylcysteine plus amiodarone versus the patients who received placebo plus amiodarone.

◆ Refers to This Month in ANESTHESIOLOGY

◆ Refers to Editorial

◆ This article has an Audio Podcast

◆ See Supplemental Digital Content

◆ CME Article

◆ This article has a Video Abstract

◆ Readers' Toolbox

◆ This article has a Visual Abstract

◆ This article is Open Access

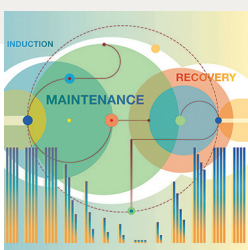

**ON THE COVER:** Residual neuromuscular blockade can be avoided with quantitative neuromuscular monitoring. In this issue of ANESTHESIOLOGY, Weigel *et al.* detail a professional practice initiative they conducted to attain documented train-of-four ratios greater than or equal to 0.90 in all patients to improve patient outcomes through reducing residual paralysis. In an accompanying editorial, Lane-Fall tells us how this new article demonstrates much about what anesthesiology has to learn from implementation science and quality improvement. Cover Illustration: A. Johnson, Vivo Visuals Studio.

- Weigel *et al.*: Quantitative Neuromuscular Monitoring in Clinical Practice: A Professional Practice Change Initiative, p. 901
- Lane-Fall: What Anesthesiology Has to Learn from Implementation Science and Quality Improvement, p. 875

-   **Intraoperative Hypotension and Acute Kidney Injury, Stroke, and Mortality during and outside Cardiopulmonary Bypass: A Retrospective Observational Cohort Study**  
*M. A. de la Hoz, V. Rangasamy, A. B. Bastos, X. Xu, V. Novack, B. Saugel, B. Subramaniam*.....927

Among 4,984 patients undergoing cardiac surgery at a single tertiary care center between 2008 and 2016, 256 (5.1%) experienced the primary outcome of stroke (66, 1.3%), acute kidney injury (125, 2.5%), or mortality (109, 2.2%). Each 10 min of hypotension (mean arterial pressure less than 65 mmHg) during, before, or after cardiopulmonary bypass was associated with an increased odds ratio of 1.06 (95% CI, 1.03 to 1.10;  $P = 0.001$ ). Intraoperative hypotension, even if it occurs outside of cardiopulmonary bypass, is independently associated with stroke, acute kidney injury, or death after cardiac surgery. *SUPPLEMENTAL DIGITAL CONTENT IS AVAILABLE IN THE TEXT*

-   **Referral Indications for Malignant Hyperthermia Susceptibility Diagnostics in Patients without Adverse Anesthetic Events in the Era of Next-generation Sequencing**  
*L. R. van den Bersselaar, A. Hellblom, M. Gashi, E.-J. Kamsteeg, N. C. Voermans, H. Jungbluth, J. de Puydt, L. Heytens, S. Riazi, M. M. J. Snoeck*.....940

The hypothesis that there is an increased referral to malignant hyperthermia units of patients without a personal or family history of adverse anesthetic events suspected to be malignant hyperthermia was tested in a retrospective multicenter cohort study. The proportion of patients referred without a personal or family history of adverse anesthetic events increased from 28.4% (61 of 215) between 2010 and 2014 to 43.6% (133 of 305) between 2015 and 2019. Patients with a personal or family history of adverse anesthetic events were more frequently diagnosed as malignant hyperthermia-susceptible (133 of 220; 60.5%) than those without (47 of 120; 39.2%). *SUPPLEMENTAL DIGITAL CONTENT IS AVAILABLE IN THE TEXT*

## BASIC SCIENCE

-   **Midazolam at Low Nanomolar Concentrations Affects Long-term Potentiation and Synaptic Transmission Predominantly via the  $\alpha_1$ - $\gamma$ -Aminobutyric Acid Type A Receptor Subunit in Mice**  
*X. Puig-Bosch, S. Bielezki, H. U. Zeilhofer, U. Rudolph, B. Antkowiak, G. Rammes*.....954

Using a combination of  $\gamma$ -aminobutyric acid type A (GABA<sub>A</sub>)  $\alpha$ -receptor subunit knock-in mice revealed that low concentrations (10 nM) of midazolam blocked long-term potentiation in the hippocampal slice preparation predominantly via  $\alpha_1$ -GABA<sub>A</sub> receptors. Electrophysiologic recordings in neocortical slice cultures imply a dominant role for the  $\alpha_1$  subtype in governing inhibitory postsynaptic current kinetics at nanomolar concentrations of midazolam. These observations suggest that, at low concentrations, midazolam enhances synaptic transmission of GABA<sub>A</sub> receptors via targeting  $\alpha_1$  subtypes and provides mechanistic explanation for the drug's sedative and amnestic action. *SUPPLEMENTAL DIGITAL CONTENT IS AVAILABLE IN THE TEXT*

## Pain Medicine

### CLINICAL SCIENCE

-   **Basal Infusion versus Automated Boluses and a Delayed Start Timer for “Continuous” Sciatic Nerve Blocks after Ambulatory Foot and Ankle Surgery: A Randomized Clinical Trial**  
*J. J. Finneran IV, E. T. Said, B. P. Curran, M. W. Swisher, J. R. Black, R. A. Gabriel, J. F. Sztain, W. B. Abramson, B. Alexander, M. C. Donohue, A. Schaar, B. M. Ilfeld*.....970

Patients undergoing foot or ankle surgery received popliteal-sciatic catheter-reservoir systems delivering ropivacaine by continuous infusion or by a bolus of anesthetic every 2 h. Those patients receiving bolus anesthetic experienced better pain control and effects of longer duration than those receiving continuous infusions.

## Education

### IMAGES IN ANESTHESIOLOGY

- Labeled Surgical Caps: A Tool to Improve Perioperative Communication**  
*B. J. Wong, A. K. Nassar, S. N. Goldhaber-Fiebert*.....983

### CLINICAL FOCUS REVIEW

-   **End-tidal Anesthetic Concentration: Monitoring, Interpretation, and Clinical Application**  
*J. F. A. Hendrickx, A. M. De Wolf*.....985

Age-adjusted fraction of minimum alveolar concentration derived from end-tidal anesthetic partial pressure measurement remains a useful drug advisory display to help prevent awareness if interpreted with proper understanding of the quantal and probabilistic nature of minimum alveolar concentration, semantics, drug interactions, and hysteresis.

### REVIEW ARTICLE

- Historical and Modern Evidence for the Role of Reward Circuitry in Emergence**  
*M. Heshmati, M. R. Bruchas*.....997

This review explores the integration of advanced systems neuroscience approaches into translational anesthesia research to elucidate the important role of mesolimbic brain reward circuitry in emergence from general anesthesia.

-  **Advances in Neuroimaging and Monitoring to Defend Cerebral Perfusion in Noncardiac Surgery**  
*J. P. Fanning, S. F. Huth, C. Robba, S. M. Grieve, D. Highton*.....1015

The authors present an introduction to the emerging roles of neuromonitoring in optimizing perioperative care through guiding intraoperative hemodynamic management, improving surgical risk stratification, and enhancing diagnosis of postoperative neurologic sequelae.

## MIND TO MIND

### Swan Song

*L. M. Y. Acosta* ..... 1039

### The Burnout Dance of the Forever Pandemic

*V. T. Raman, V. A. Olbrecht, A. M. Fernandez* ..... 1040

## CORRESPONDENCE

### Evolution of Anesthesia Patient Safety Movement: Comment

*E. M. Brown* ..... 1042

### Evolution of Anesthesia Patient Safety Movement: Reply

*M. A. Warner, M. E. Warner* ..... 1042

### Pressure Support Ventilation and Atelectasis: Comment

*C. Zaouter, A. Moore, F. M. Carrier, J. Girard, M. Girard* ..... 1043

### Pressure Support Ventilation and Atelectasis: Reply

*H. Jeong, H. J. Ahn* ..... 1044

### Targeting Depth of Anesthesia to Prevent Delirium: Comment

*X. Xiong, D. Chen, X. Li, J. Shi* ..... 1045

### Targeting Depth of Anesthesia to Prevent Delirium: Comment

*M. Carella, V. L. Bonhomme* ..... 1046

### Targeting Depth of Anesthesia to Prevent Delirium: Reply

*C. H. Brown IV, C. W. Hogue* ..... 1047

## Reviews of Educational Material ..... 1049

### Anesthesiology Reflections from the Wood Library-Museum

#### Ethereal Breath of the Gods: Always Circulating Aither

*M. L. Coleman, G. S. Bause* ..... 926

#### Only Half Dead: Henry H. Hickman and “Suspended Animation”

*J. S. Moon* ..... 939

## Careers & Events ..... A19

## INSTRUCTIONS FOR AUTHORS

The most recently updated version of the Instructions for Authors is available at [www.anesthesiology.org](http://www.anesthesiology.org). Please refer to the Instructions for the preparation of any material for submission to ANESTHESIOLOGY.

Manuscripts submitted for consideration for publication must be submitted in electronic format via Editorial Manager (<https://www.editorialmanager.com/aln>). Detailed directions for submission and the most recent version of the Instructions for Authors can be found on the Journal's Web site (<http://www.anesthesiology.org>). Books and educational materials for review should be sent to Alan Jay Schwartz, M.D., M.S.Ed., Director of Education, Department of Anesthesiology and Critical Care Medicine, The Children's Hospital of Philadelphia,

**ANESTHESIOLOGY** (ISSN 0003-3022) is published monthly by Wolters Kluwer Health, Inc., 1800 Dual Highway, Suite 201, Hagerstown, MD 21740-6636. Business office: Two Commerce Square, 2001 Market Street, Philadelphia, PA 19103. Periodicals postage paid at Hagerstown, MD, and at additional mailing offices. Copyright © 2022, the American Society of Anesthesiologists. All Rights Reserved.

**Annual Subscription Rates:** *United States*—\$1125 Individual, \$2904 Institution, \$442 In-training. *Rest of World*—\$1186 Individual, \$3224 Institution, \$442 In-training. Single copy rate \$288. Subscriptions outside of North America must add \$58 for airfreight delivery. Add state sales tax, where applicable. The GST tax of 7% must be added to all orders shipped to Canada (Wolters Kluwer Health, Inc.'s GST Identification #895524239, Publications Mail Agreement #1119672). Indicate in-training status and name of institution. Institution rates apply to libraries, hospitals, corporations, and partnerships of three or more individuals. Subscription prices outside the United States must be prepaid. Prices subject to change without notice. Subscriptions will begin with currently available issue unless otherwise requested. Visit us online at [www.lww.com](http://www.lww.com).

Individual and in-training subscription rates include print and access to the online version. Online-only subscriptions for individuals (\$372) and persons in training (\$372) are available to nonmembers and may be ordered by downloading a copy of the Online Subscription FAXback Form from the Web site, completing the information requested, and faxing the completed form to 301-223-2400. Institutional rates are for print only; online subscriptions are available via Ovid. Institutions can choose to purchase a print and online subscription together for a discounted rate. Institutions that wish to purchase a print subscription, please contact Wolters Kluwer Health,

34th Street and Civic Center Blvd., Room 9327, Philadelphia, Pennsylvania 19104-4399. Article-specific permission requests are managed with Copyright Clearance Center's Rightslink service. Information can be accessed directly from articles on the journal Web site. More information is available at <http://anesthesiology.pubs.asahq.org/public/rightsandpermissions.aspx>. For questions about the Rightslink service, e-mail [customer-care@copyright.com](mailto:customer-care@copyright.com) or call 877-622-5543 (U.S. only) or 978-777-9929. Advertising and related correspondence should be addressed to Advertising Manager, ANESTHESIOLOGY, Wolters Kluwer Health, Inc., Two Commerce Square, 2001 Market Street, Philadelphia, Pennsylvania 19103 (Web site: <http://www.wkad-center.com/>). Publication of an advertisement in an ASA publication or on an ASA website does not constitute endorsement or evaluation by ASA or by ASA's publishing partners of the product or service described therein or of any representations or claims made by the advertiser with respect to the product or service.

Inc., 1800 Dual Highway, Suite 201, Hagerstown, MD 21740-6636; phone: 800-638-3030; fax: 301-223-2400. Institutions that wish to purchase an online subscription or online with print, please contact the Ovid Regional Sales Office near you or visit [www.ovid.com/site/index.jsp](http://www.ovid.com/site/index.jsp) and select Contact and Locations.

**Address for non-member subscription information, orders, or change of address:** Wolters Kluwer Health, Inc., 1800 Dual Highway, Suite 201, Hagerstown, MD 21740-6636; phone: 800-638-3030; fax: 301-223-2400.

**Address for member subscription information, orders, or change of address:** Members of the American Society of Anesthesiologists receive the print and online journal with their membership. To become a member or provide a change of address, please contact the American Society of Anesthesiologists, 1061 American Lane, Schaumburg, Illinois 60173-4973; phone: 847-825-5586; fax: 847-825-1692; e-mail: [membership@ASAhq.org](mailto:membership@ASAhq.org). For all other membership inquiries, contact Wolters Kluwer Health, Inc., Customer Service Department, P.O. Box 1610, Hagerstown, MD 21740; phone: 800-638-3030; fax: 301-223-2400.

**Postmaster:** Send address changes to ANESTHESIOLOGY, P.O. BOX 1610, Hagerstown, MD 21740.

**Advertising:** Please contact Angie Clements, National Account Manager, Health Learning, Research & Practice, Medical Journals, Wolters Kluwer Health, Inc.; phone: 501-502-8152; e-mail: [Angie.Clements@wolterskluwer.com](mailto:Angie.Clements@wolterskluwer.com). For classified advertising: Dave Wiegand, Recruitment Advertising Representative, Wolters Kluwer Health, Inc.; phone: 847-361-6128; e-mail: [Dave.Wiegand@wolterskluwer.com](mailto:Dave.Wiegand@wolterskluwer.com).
